# Supplementary material
Source: MDPI journal article supplement (https://www.mdpi.com/2071-1050/15/4/3438)
Supplement: s1 [file s1 › sustainability-2200617-supplementary.pdf]

## Supplementary Materials

This part includes five supplementary tables, which are first-hand data table summarized from the five SDGs, these tables totally follow SDGs' original expression and details. These five first-hand tables present guideline's logic. In addition, all the five tables have processed again according to the logic of the paper and put them into the paper finally.

**Table S1:** The applications of smart technologies in the Beijing SDGs based on guideline's logic

| Technical category       | Object                   | Purpose                          | Description                                                                                                                                                                                                                                                                                                           |
|--------------------------|--------------------------|----------------------------------|-----------------------------------------------------------------------------------------------------------------------------------------------------------------------------------------------------------------------------------------------------------------------------------------------------------------------|
| Traffic assistance       | Bus Stop                 | Optimize route                   | Build a bus information platform using big data to provide bus arrival information                                                                                                                                                                                                                                    |
|                          | Shared Bicycle           | Promote low-carbon transport     | Smart parking piles with mobile application platform can grasp the situation of the bicycle in real time and standardized the use of bicycles                                                                                                                                                                         |
|                          | Vehicle Lane             | Improve driving efficiency       | Set up traffic lights to form green-wave belt, dynamically add reversible lanes                                                                                                                                                                                                                                       |
|                          | Parking Lot              | Optimize parking resources       | Build a perfect smart parking and charging system to promote the realization of shared parking resources                                                                                                                                                                                                              |
| Facilities interaction   | Light Pole               | Collect multiple data            | Smart light pole integrates traffic flow detection, pedestrian detection, road emergency detection, traffic guidance, communication base station, Wi-Fi detection, environmental detection, alarm call and LED lighting functions                                                                                     |
|                          | Streetlamp               | Optimize lighting                | Use timed, photoelectric control, automatic flow induction functions                                                                                                                                                                                                                                                  |
|                          | Public Toilet            | Provide health services          | Innovate and integrate multi-dimensional smart service models and improve the layout of public toilet                                                                                                                                                                                                                 |
|                          | Urban Furniture          | Provide interactive self-service | Encourage public phone booths, newsstand, bus stops, waste bins, manhole covers and other facilities to carry out functional integration and transformation, and set up interactive information systems to provide all kinds of information, self-service retail, recreation, Wi-Fi, charging pile and other services |
| Environmental Monitoring | Public Art Installations | Enhance inter-actions            | The media of sound, image, smell and tactile experiences are expanded through urban furniture and public art equipment                                                                                                                                                                                                |
|                          | Comprehensive Platform   | Improve efficiency               | Carry out data analysis terminal and automatic identification of special cases to realize real-time electronic warning to assist public security prevention                                                                                                                                                           |
|                          | Smart Device             | Share various data               | Interaction of apps, roadside electronic alarm, smart parking cloud platform, express delivery and newsstands                                                                                                                                                                                                         |

**Table S2:** The applications of smart technologies in the Shanghai SDGs based on guideline's logic

| Technical category       | Object                                | Purpose                    | Description                                                                                                                                                                                      |
|--------------------------|---------------------------------------|----------------------------|--------------------------------------------------------------------------------------------------------------------------------------------------------------------------------------------------|
| Space intensification    | Municipal Facilities, Urban Furniture | Save street space          | Encourage the use of "multi-purpose for one rod and box" and control the occupied proportion of facilities less than 20%, and the interface attachment rate of smart facilities should reach 60% |
| Efficient transportation | Signal Light                          | Improve traffic efficiency | Smart traffic lights will be set up to form a green-wave traffic belt and a special bus signal system will be set up to ensure priority for public buses                                         |

|                   |                                            |                                   |                                                                                                                                                                                                                                                                                                                                |
|-------------------|--------------------------------------------|-----------------------------------|--------------------------------------------------------------------------------------------------------------------------------------------------------------------------------------------------------------------------------------------------------------------------------------------------------------------------------|
| Safety protection | Bus Stop                                   | Provide real-time bus information | Create an electronic bus stop board, provide multi-media and passenger complaint information                                                                                                                                                                                                                                   |
|                   | Shared Bicycle                             | Combined with the bus system      | Improve the combined transportation of the public transportation system and the bicycle rental point, search the location of the surrounding rental point, the number of available bicycles for loan, and make reservations for borrowing and returning                                                                        |
|                   | Parking Lot                                | Coordinate parking conflicts      | Popularize the city's roadside parking space management, the city's parking guidance and parking space induction system                                                                                                                                                                                                        |
|                   | Traffic Information Panel                  | Improve information coverage      | Integrate traffic information and query terminal along the street, through the terminal can be used to query for all kinds of traffic information and reduce the dependence on apps                                                                                                                                            |
|                   | Audio and Video Surveillance Installations | Keep security                     | Video and audio monitoring installations should be popularized to realize full coverage and warning for natural disasters. It is suggested that relevant departments build a platform to analyze the data provided by terminals and automatically identify special situations, so as to improve the level of security services |
|                   | Signal Light                               | Focus on vulnerable people        | Provide sound prompts of signal lights at crossings, set up infrared sensing prompts at pedestrian crossings, and set up emergency call facilities at event-prone locations, which should be combined with street facilities such as signal lights                                                                             |
|                   | Advertising Electronic Screen              | Provide living information        | It is recommended to set up electronic screens in crowd gathering places to promote the real-time release of public security prevention. The information release screen can be used to provide life, service, business, medical and other information, and the screen can be combined with advertising facilities              |
|                   | Newsstands                                 | Provide life service              | Provide self-service retail, charging pile, Wi-Fi, express delivery, mobile payment and other services                                                                                                                                                                                                                         |
|                   | Public Art Installations                   | Trigger public activities         | Important public space can set art installations to expand the sound, image, smell and tactile experiences                                                                                                                                                                                                                     |
|                   | Streetlamp Shade                           | Collect environmental data        | Add environmental detection sensors to carry out real-time monitoring of noise, air quality and temperature along the street. The coverage rate of environmental monitors, the monitoring proportion of key pollution sources and the monitoring rate of water quality should all reach 80%                                    |
| Urban environment | Light Pole                                 | Save energy                       | The light pole adopts control functions such as timed, photoelectric control and automatic induction of human flow                                                                                                                                                                                                             |
|                   | Garbage Can                                | Reduce pollution                  | Use solar energy to compress the garbage volume, and notify sanitation personnel to transfer                                                                                                                                                                                                                                   |
|                   | Green Irrigator System                     | Saving water                      | Through humidity sensing, the irrigation time and water volume are intelligently adjusted to achieve dynamic management                                                                                                                                                                                                        |

**Table S3:** The applications of smart technologies in the Shenzhen SDGs based on guideline's logic

| Application Scenario        | Object                        | Purpose                       | Description                                                                                                                                                                                           |
|-----------------------------|-------------------------------|-------------------------------|-------------------------------------------------------------------------------------------------------------------------------------------------------------------------------------------------------|
| Urban Activities perception | Refined transportation system | Record human and vehicle data | Radar, geomagnetic, thermal sensing, satellite positioning, IoT and other technologies are used to record the types and quantities of vehicles and the spatial-temporal characteristics of human flow |
|                             | Underpass                     | Reduce crime rates            | Use "Sound tunnels" to provide a responsive space in the city's underground, and increases the safety and                                                                                             |

|                              |                                 |                                        |                                                                                                                                                                                                                                            |
|------------------------------|---------------------------------|----------------------------------------|--------------------------------------------------------------------------------------------------------------------------------------------------------------------------------------------------------------------------------------------|
| Management of Infrastructure | Urban Furniture                 | Provide life services                  | vitality through interactive experiences with light and sound<br>Trash can have automatic compression, collecting data with IOT and classification; newsstand are equipped with charging, Wi-Fi, self-service shopping and other functions |
|                              | Street infrastructure           | Improve work efficiency                | Use the IoT to build a full range of street infrastructure monitoring, to achieve infrastructure operation, monitoring, early warning, management and other life cycle management                                                          |
| Environmental Monitoring     | Streetlamp Shade                | Collect environmental data             | Popularize environmental monitoring sensors to monitor air pollutant, street noise, temperature and humidity, wind speed, and key pollution sources                                                                                        |
|                              | Information Panel               | Provide traffic information            | Establish a comprehensive information panel through smart street lights and public green traffic ways to provide information about the transportation system of buses, subways, buses, trains, planes and ferries information              |
| Travel Assistance            | Composite Transportation System | Establish a barrier-free travel system | The establishment of personalized travel demand customization for the elderly, the weak, the disabled, pregnant and other groups, combined with barrier-free facilities for customized decision-making before travel                       |
|                              | Smart Life Micro-Hub            | Improve work efficiency                | The smart micro hub is used to customize the "shift level" connection of transportation services according to needs, and coordinate the connection between leasing, purchasing, office and other activities                                |
| Transportation Control       | Safety Devices                  | Improve safety at street crossings     | Infrared thermal imaging facilities are used to monitor pedestrian tracks. Ground signal lights, pedestrian induction flash lights and smart spikes are installed to ensure pedestrian safety                                              |
|                              | Signal lamp sounding device     | Protect the visually impaired          | Visually impaired people can identify signal lights by sound, and the volume is automatically adjusted according to ambient noise                                                                                                          |
|                              | Shared Bicycle                  | Optimize parking resources             | The bicycle parking area, business district, office area, residential area and public transportation station are jointly planned, and the bicycle information is obtained through mobile phone terminal                                    |

**Table S4:** The applications of smart technologies in the Nanjing SDGs based on guideline's logic

| Technical category   | Object                    | Purpose                                         | Description                                                                                                                                                                                                                                   |
|----------------------|---------------------------|-------------------------------------------------|-----------------------------------------------------------------------------------------------------------------------------------------------------------------------------------------------------------------------------------------------|
| Smart Transportation | Bus Corridor              | Improve the efficiency of public transportation | The main traffic road is equipped with special bus corridor, and establish the special bus signal system                                                                                                                                      |
|                      | Signal Light              | Improve urban efficiency                        | Combined with the monitoring of traffic flow to form "green wave traffic". Considering the travel demand of vulnerable groups, the signal light sound prompt device, infrared induction prompt device and distress calling facility are added |
|                      | Traffic Monitoring System | Improve traffic efficiency                      | All kinds of smart traffic monitoring facilities are set up near road intersections to realize intelligent management of traffic flow                                                                                                         |
|                      | Parking Lot               | Optimize parking resources                      | Encourage parking space sharing in cities, improve coverage of parking guidance systems and provide automatic hourly payment systems                                                                                                          |

|                       |                |                               |                                                                                                                                                                                                                                                                                              |
|-----------------------|----------------|-------------------------------|----------------------------------------------------------------------------------------------------------------------------------------------------------------------------------------------------------------------------------------------------------------------------------------------|
| Space intensification | Bus Stop       | Provide information           | Equipped with GPS positioning system, combined with weather data to provide travel guidance                                                                                                                                                                                                  |
|                       | Shared Bicycle | Combined with the bus system  | The bicycle rental point should be set up in combination with bus stations and public areas with dense flow of people, and connected with the app terminal                                                                                                                                   |
|                       | Light Pole     | Save space                    | On the premise of the standards, the street light pole and the traffic facility pole should be integrated, and the signal lamp, traffic monitoring, environmental monitoring and other sensors should be integrated                                                                          |
|                       | Streetlamp     | Save energy                   | Encourage the use of inductive sidewalk street lamps to provide targeted lighting                                                                                                                                                                                                            |
| Convenient Living     | Newsstand      | Provide life services         | Furniture such as public phone booths and newsstands can be centralized and integrated through renovation, introducing multimedia data terminals to provide street and surrounding information inquiry, and equipped with WIFI hotspot function to transition to media information terminals |
|                       | Trash Can      | Reduce pollution and emission | With automatic garbage compression and full capacity reminder function                                                                                                                                                                                                                       |

**Table S5:** The applications of smart technologies in the Qingdao SDGs based on guideline's logic

| Technical category                             | Object                         | Purpose                                               | Description                                                                                                                                                                                                                                                                                                                                                        |
|------------------------------------------------|--------------------------------|-------------------------------------------------------|--------------------------------------------------------------------------------------------------------------------------------------------------------------------------------------------------------------------------------------------------------------------------------------------------------------------------------------------------------------------|
| Information Technology for Acquiring City Data | Oblique Photography Technology | Collect information on the physical spaces of streets | The oblique photography technology is used to collect the data information of street form, color and texture, and analyze the sight corridor, landscape corridor and city skyline                                                                                                                                                                                  |
|                                                | Portrait Technology            | Improve business vitality                             | Based on the POI data, the advantages and patterns of street business forms were analyzed, and the characteristics of the crowd were analyzed to make portraits, so as to match the business forms and stimulate the vitality of the streets                                                                                                                       |
|                                                | Emergency callbox              | Optimize information dissemination channels           | It is equipped with high-density networked urban data sensors to realize the perception of urban micro-environment changes and the prediction of future spatial-temporal development trends. An early warning information system shall be established to monitor, predict and warn all kinds of emergencies such as natural disasters, accidents and public health |
|                                                | Vehicle Lane                   | Improve driving efficiency                            | According to the passenger flow data of lines and stations, passenger-vehicle flow data of different periods and big data of people's travel, the intelligent cloud computing platform is used to conduct intelligent scheduling for buses, taxis, online ride-hailing, rail transit and static parking                                                            |
| Transportation Assistance                      | Signal light                   | Improve urban efficiency                              | The smart signal light at the intersection collects real-time traffic flow, and form the green wave traffic belt at the intersection intelligently optimize. When an emergency occurs, the traffic flow data automatically allocates the signal light time, and the green life belt is customized for ambulances and fire trucks immediately                       |
|                                                | Bus Corridor                   | Improve the efficiency of public transportation       | Combined with the important bus corridor to establish a special bus signal system, to ensure the priority of public transport, improve efficiency                                                                                                                                                                                                                  |
| Convenient Living                              | Street lamp                    | Collect environmental data                            | The "smart street lamp" with photoelectric control and self-movement mode of human flow will be adopted, and the multi-sensor intensive rod mode such as 5G base                                                                                                                                                                                                   |

---

|                               |                           |                                                                                                                                                                                                                                                                 |
|-------------------------------|---------------------------|-----------------------------------------------------------------------------------------------------------------------------------------------------------------------------------------------------------------------------------------------------------------|
|                               |                           | station, Wi-Fi coverage, electric vehicle charging, air quality monitoring and monitoring networking will be promoted                                                                                                                                           |
| Electronic information screen | Provide handy information | The electronic information screen is set up in the crowd gathering place, and all kinds of travel related information can be queried through the terminal                                                                                                       |
| Mobile baby care room         | Provide health services   | The mobile baby care room can be set up in combination with the store, or can be set up independently in the street facilities. It is suggested to combine solar energy facilities, power supply by itself, and realize the intelligence of internal facilities |
| Newsstand                     | Provide life services     | To stimulate the memory and vitality of the city, more self-service retail, leisure and entertainment, charging piles, Wi-Fi and express collection services will be added                                                                                      |

---
